# Supplementary material
Source: Springer Nature journal article supplement (https://www.springermedizin.de/resource/supplementary/12957_2011_1072_MOESM4_ESM.pdf/9562192)

**A.Pat1 PreRT**

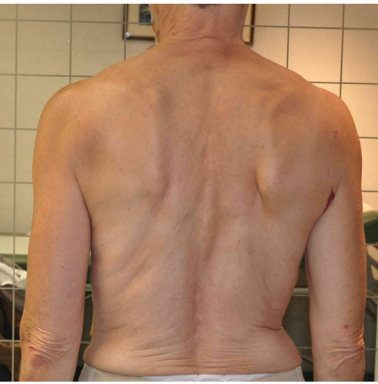

**B.Pat1 PreRT**

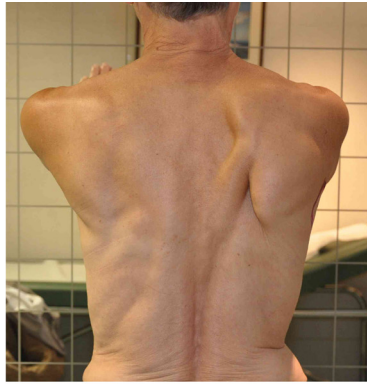

**C.Pat2 PreRT**

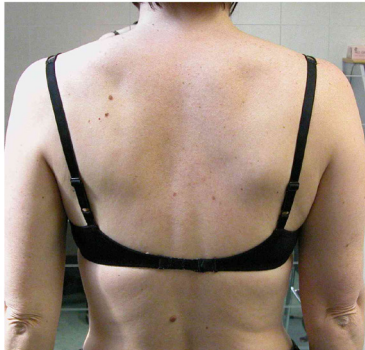

**D.Pat2 PreRT**

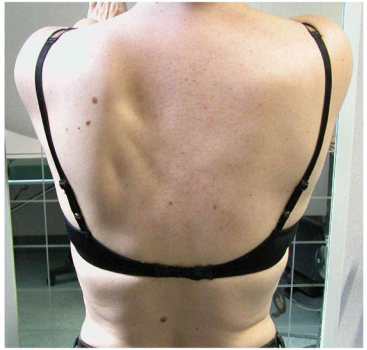

**E.Pat2 PostRT**

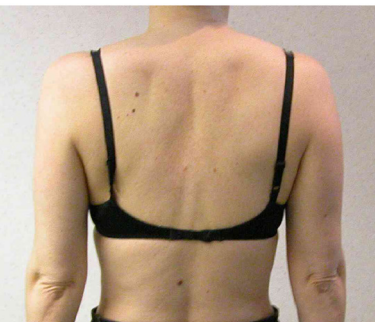

**F.Pat2 PostRT**

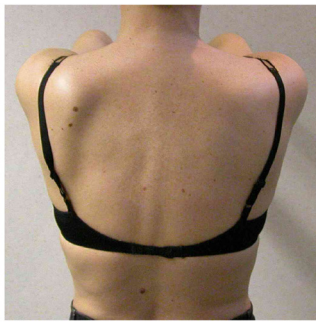

**G.Pat3 PreRT**

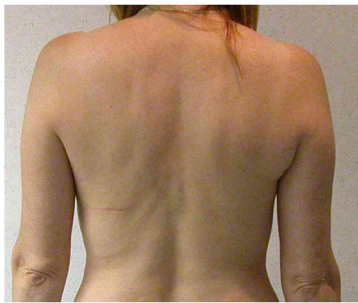

**H.Pat3 PreRT**

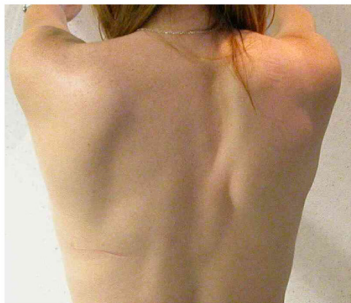

Supplement: MOESM4 [file 9562192]
